# Supplementary material for: Hydrophobic Modification of Chitosan via Reactive Solvent-Free Extrusion
Source: MDPI journal article supplement (doi:10.3390/polym13162807), 2021-08-21
Supplement: s1 [file s1]

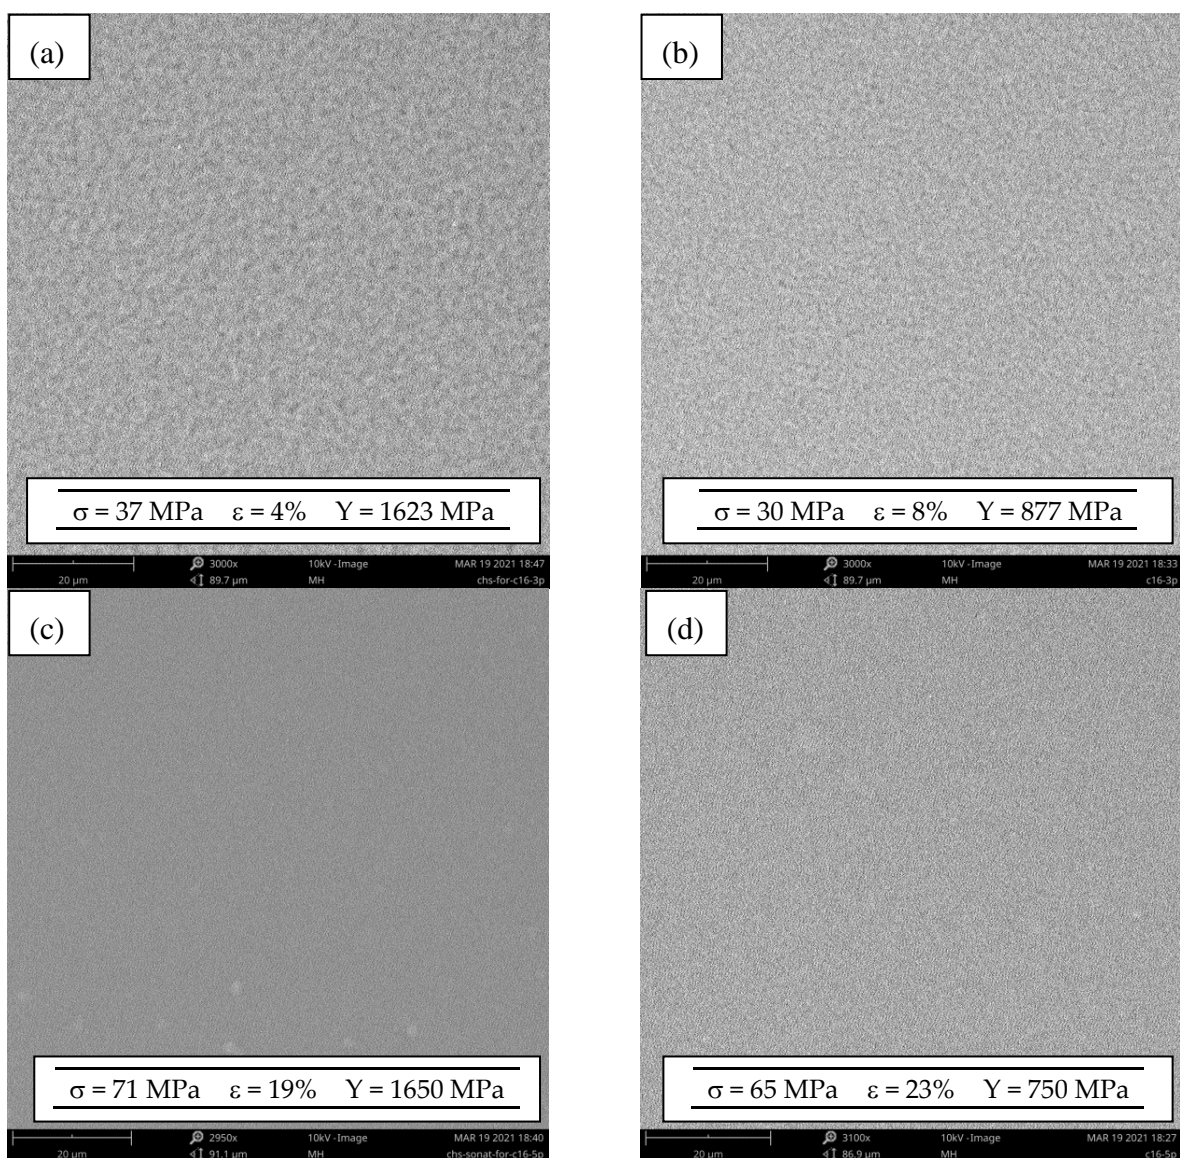

**Figure S2.** SEM micrographs of the films made of: (a) Ch1-LMw sample (degree of polymerization (DP) of 500, degree of acetylation (DA) of 0.13); (b) Ch1-L-C16-3s (fraction soluble in AcOH, average 6 alkyl substitutes per chitosan macromolecule); (c) Ch-HMw sample (DP of 2000, DA of 0.2); (d) Ch-H-C16-5s (fraction soluble in AcOH, average 12 alkyl substitutes per chitosan macromolecule).
