# Supplementary figures and images for: Hydrophobic Modification of Chitosan via Reactive Solvent-Free Extrusion
Source: MDPI journal article supplement (doi:10.3390/polym13162807), 2021-08-21

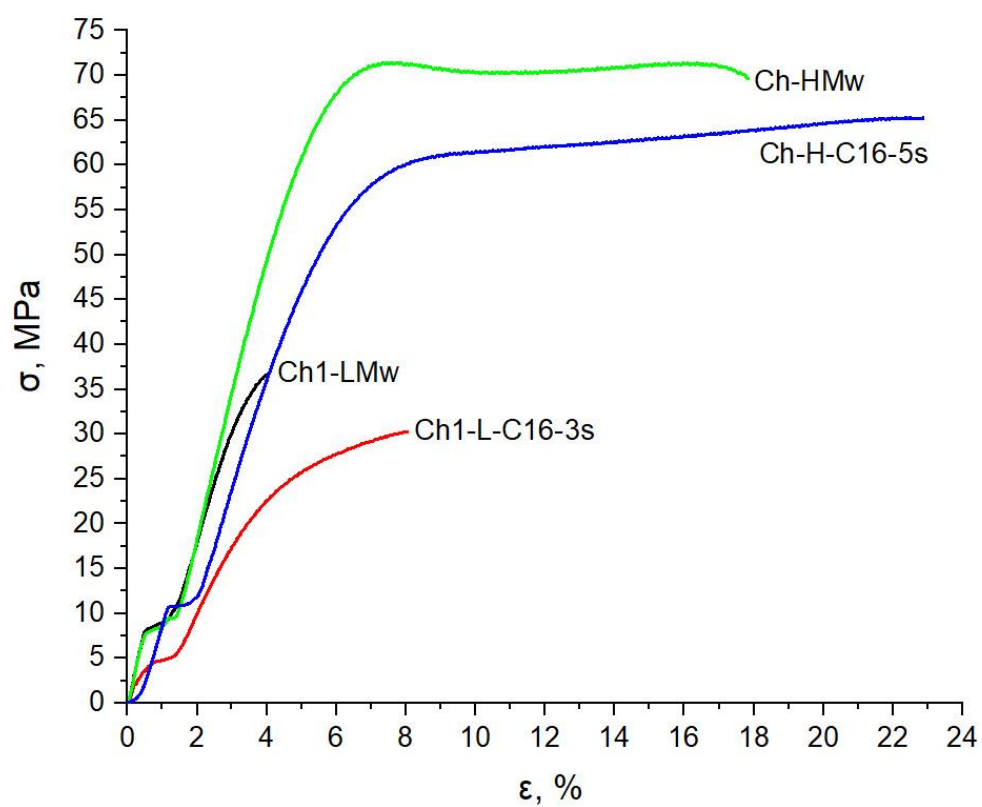

**Figure S1.** Deformation curves of the film samples of initial and the modified chitosan.

Supplement: s1 [file s1]
